# Supplementary material
Source: PubMed Central journal article supplement (PMC6129527)
Supplement: ajtr0010-2306-f10.pdf [file ajtr0010-2306-f10.pdf]

## Superior antiproliferative properties of hybrid nanomaterials

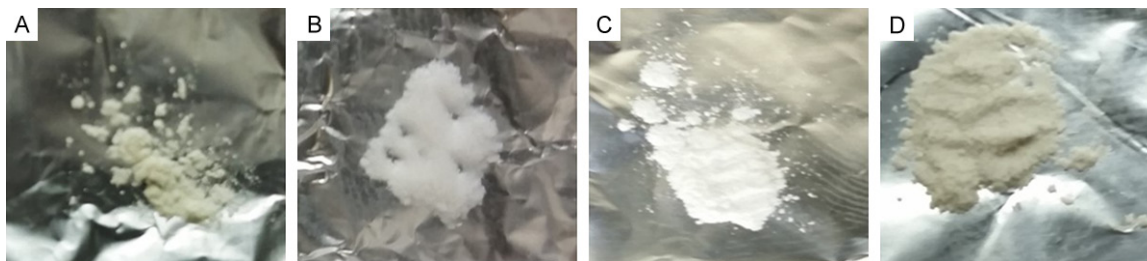

**Figure S1.** Aspect of samples evaluated in this study. Gen (A) is observed as a semi-hygroscopic beige powder; SiNPs (B) had the appearance of a white crystalline powder; PEG-SiNPs (C) was obtained as a fine white powder, very similar to the aspect of talc; Gen-PEG-SiHNM (D) had a very similar appearance to the PEG-SiNPs, a fine powder, but with a slightly beige color, much like the original color of genistein.

### Stability during storage

Samples of HNM obtained were placed in amber vials and stored in desiccators at room temperature. After 6 months, stability of formulated nanomaterials was determined evaluating its mean particle size, shape, surface charge, amount of loaded Gen according the methodology described previously.

**Table S1.** Mean particle size,  $\zeta$ -potential, and percentage (EE%) of genistein-loaded PEGylated silica hybrid nanomaterials (Gen-PEG-SiHNM) after 6 months storage

| Samples       | Storage  | Mean particle size (nm) | Zeta potential (mV)  | EE%               |
|---------------|----------|-------------------------|----------------------|-------------------|
| Gen-PEG-SiHNM | Initial  | $35.66 \pm 2.05^a$      | $+ 9.54 \pm 0.994^a$ | $58.2 \pm 5.16^a$ |
|               | 6 months | $30.91 \pm 3.66^a$      | $+ 8.36 \pm 1.037^a$ | $50.6 \pm 3.73^a$ |

"a" indicates no significant difference ( $P < 0.05$ ) between fresh and stored hybrid nanomaterials. Results are expressed as mean  $\pm$  standard error of at least three different batches analyzed by triplicate.

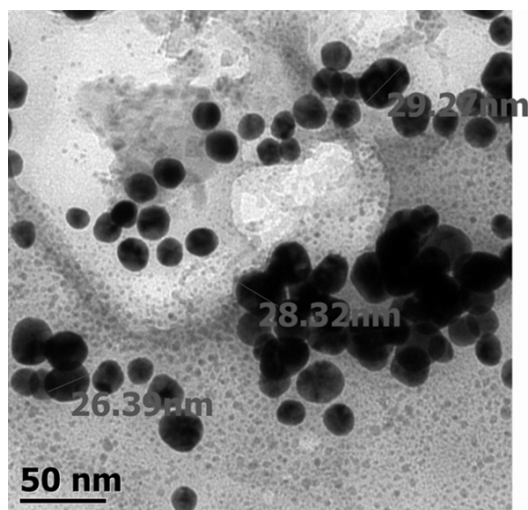

**Figure S2.** Morphological analyses by TEM of Gen-PEG-SiHNM stored for 6 months; it can be observed that mean particle size and morphology remained after storage.
